# Supplementary material for: Autocrine TGF-β1 Maintains the Stability of Foxp3+ Regulatory T Cells via IL-12Rβ2 Downregulation
Source: PubMed Central journal article supplement (PMC7356964; doi:10.3390/biom10060819), 2020-05-27
Supplement: biomolecules-10-00819-s001.pdf [file biomolecules-10-00819-s001.pdf]

Article-Supplementary Materials

# Autocrine TGF- $\beta$ 1 maintains the stability of Foxp3<sup>+</sup> regulatory T cells via IL-12R $\beta$ 2 downregulation

Garam Choi<sup>1,2</sup>, Hyeongjin Na<sup>1,2</sup>, Da-Sol Kuen<sup>1,2</sup>, Byung-Seok Kim<sup>1,3,\*</sup> and Yeonseok Chung<sup>1,2,\*</sup>

<sup>1</sup> Laboratory of Immune Regulation, Research Institute of Pharmaceutical Sciences, College of Pharmacy, Seoul National University, Seoul 08826, Republic of Korea; [grhappy@snu.ac.kr](mailto:grhappy@snu.ac.kr) (G.C.); [hyeongjinna@snu.ac.kr](mailto:hyeongjinna@snu.ac.kr) (H.N.); [dkuen592@snu.ac.kr](mailto:dkuen592@snu.ac.kr) (D.-S.K.)

<sup>2</sup> BK21 Plus Program, College of Pharmacy, Seoul National University, Seoul 08826, Republic of Korea

<sup>3</sup> Division of Life Sciences, College of Life Science and Bioengineering, Incheon National University, Incheon 22012, Republic of Korea

\* Correspondence: [yeonseok@snu.ac.kr](mailto:yeonseok@snu.ac.kr) (Y.C.); Tel: +82-2-880-7874 (Y.C.); Fax: +82-2-872-1795 (Y.C.); [byungseokkim@inu.ac.kr](mailto:byungseokkim@inu.ac.kr) (B.-S.K.); Tel: +82-32-835-8893 (B.-S.K.); Fax: +82-32-835-0754 (B.-S.K.)

Received: date; Accepted: date; Published: date

## Supplemental Figures

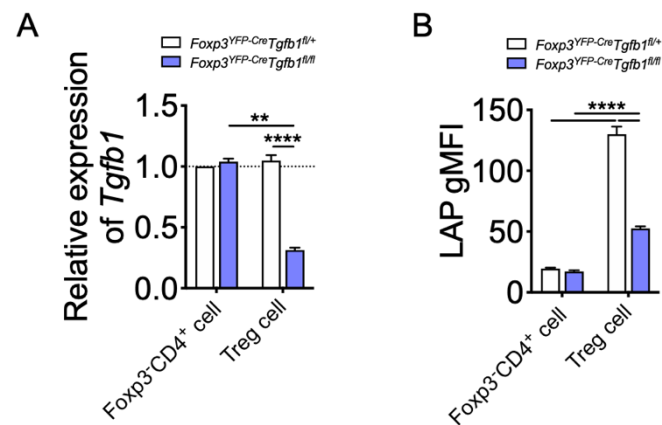

**Supplemental figure 1. Expression of TGF- $\beta$ 1 in Foxp3-CD4<sup>+</sup> and Treg cells.** (A) Sorted Foxp3-CD4<sup>+</sup> or Foxp3-CD4<sup>+</sup> (Treg) cells from *Foxp3<sup>YFP-Cre</sup>Tgfb1<sup>fl/+</sup>* or *Foxp3<sup>YFP-Cre</sup>Tgfb1<sup>fl/fl</sup>* were analyzed by qRT-PCR. (B) Geometric mean fluorescence intensity (gMFI) of LAP among Foxp3-CD4<sup>+</sup> cells or Treg cells from mesenteric lymph nodes (MLN) (n=4). Quantification plots show mean +SEM (A and B). \*\*p $\leq$ 0.01 and \*\*\*\*p $\leq$ 0.0001 by two-tailed Student's t test.

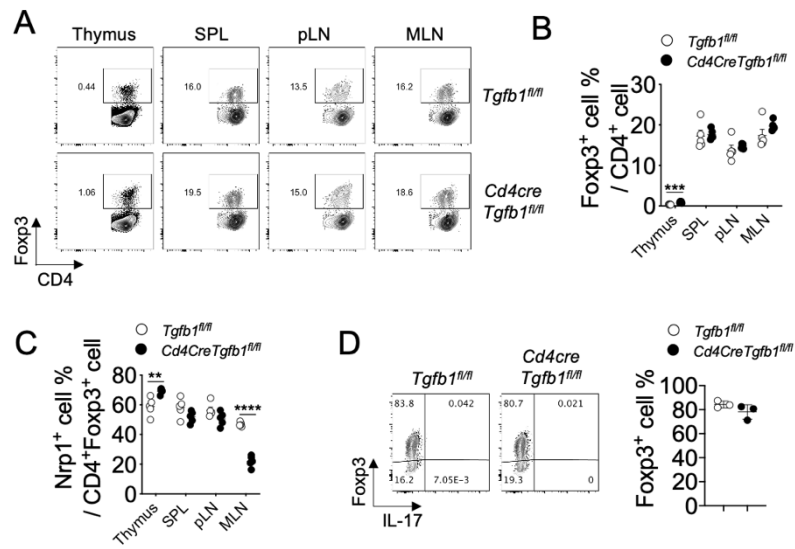

**Supplemental figure 2. Treg cell phenotypes in control or T-cell specific TGF-β1-deficient mice.** (A) Flow cytometric analysis of Foxp3 expression in CD4<sup>+</sup> T cells from thymus, spleen (SPL), peripheral lymph nodes (pLN) and MLN of *Tgfb1<sup>fl/fl</sup>* and *Cd4CreTgfb1<sup>fl/fl</sup>* mice at 8-15-week-old (n=5). (B) Graph depicting the frequency of Foxp3<sup>+</sup> cells among gated CD4<sup>+</sup> cells from thymus, SPL, pLN and MLN (n=5). (C) Expression of Nrp1 in CD4<sup>+</sup>Foxp3<sup>+</sup> cells from thymus, SPL, pLN and MLN (n=4). (D) Naïve T cells from *Cd4creTgfb1<sup>fl/fl</sup>* and *Tgfb1<sup>fl/fl</sup>* mice were differentiated to Treg cells in vitro for 3 days and analyzed for the expression of Foxp3 by flow cytometry. Data are representative of four (A-C) or two (D) independent experiments. Quantification plots show mean ±SD (B-D). \*\*p≤0.01, \*\*\*p≤0.001 and \*\*\*\*p≤0.0001 by two-tailed Student's t test.

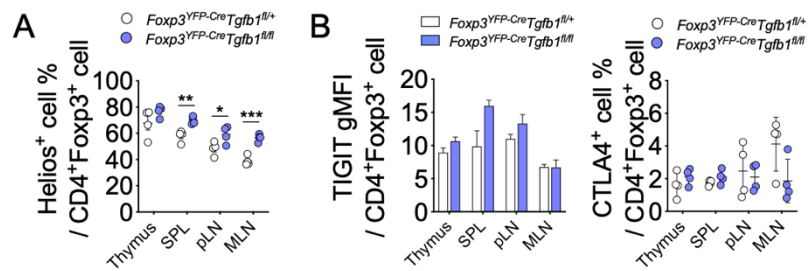

**Supplemental figure 3. Expression of functional markers in Treg cells.** (A) Frequencies of Helios<sup>+</sup> cells in CD4<sup>+</sup>Foxp3<sup>+</sup> cells from thymus, SPL, pLN and MLN (n=4). (B) Expression of TIGIT and CTLA4 in CD4<sup>+</sup>Foxp3<sup>+</sup> cells from thymus, SPL, pLN and MLN (n=4). Quantification plots show mean ±SD (A, B; right graph) or +SEM (B; left graph). \*p≤0.05, \*\*p≤0.01 and \*\*\*p≤0.001 by two-tailed Student's t test.

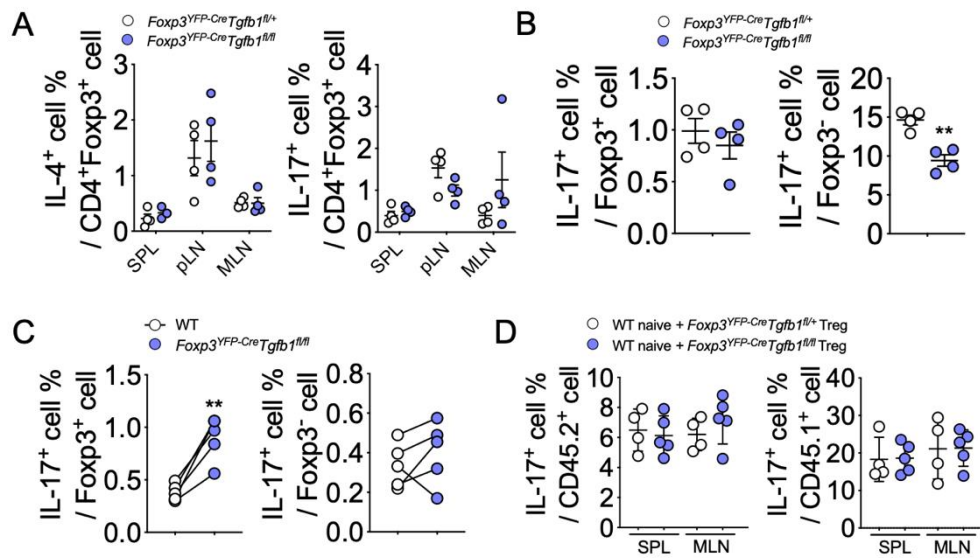

**Supplemental figure 4. IL-17 expression in TGF-β1-sufficient or deficient T cells.** (A) Flow cytometric analysis of IL-4 or IL-17 expression in CD4<sup>+</sup>Foxp3<sup>+</sup> T cells from SPL, pLN and MLN of *Foxp3<sup>YFP-CreTgfb1</sup><sup>fl/+</sup>* and *Foxp3<sup>YFP-CreTgfb1</sup><sup>fl/fl</sup>* mice at 8-week-old (n=4) (B) Purified Treg cells co-cultured with bone marrow-derived dendritic cells (BMDc) in the presence of LPS. Quantification of IL-17-expressing cells among CD4<sup>+</sup>Foxp3<sup>+</sup> or CD4<sup>+</sup>Foxp3<sup>-</sup> cells. (C) Mixed-Treg cell co-culture experiment. Quantification of IL-17-expressing cells among CD4<sup>+</sup>Foxp3<sup>+</sup> or CD4<sup>+</sup>Foxp3<sup>-</sup> cells in CD45.1<sup>+</sup> (Wild-type (WT); TGF-β1-sufficient) or CD45.2<sup>+</sup> (TGF-β1-deficient) cells. (D) WT naïve T cells (CD45.1<sup>+</sup>) were transferred to *Rag1*<sup>-/-</sup> mice with sorted YFP<sup>+</sup>Treg cells from *Foxp3<sup>YFP-CreTgfb1</sup><sup>fl/+</sup>* or *Foxp3<sup>YFP-CreTgfb1</sup><sup>fl/fl</sup>* mice. Quantification of IL-17<sup>+</sup> cells among CD45.1<sup>+</sup> cells in SPL and MLN (n=4-5). Data are representative of two (A, C, D) or five (B) independent experiments. Quantification plots show mean ±SD (A, B, D). \*\*p≤0.01 by two-tailed Student's t test.
